# Supplementary material for: Evaluation of an RNAseq-Based Immunogenomic Liquid Biopsy Approach in Early-Stage Prostate Cancer
Source: MDPI journal article supplement (doi:10.3390/cells10102567), 2021-09-28
Supplement: s1 [file s1]

Supplementary figure legends

Supplementary Figure S1 – Data Integrity

N=1018 (713 discovery, 305 validation)  
PSA total missing: 12 (imputed with median, 5.1)  
Vol missing: 99 (imputed with median, 40.8)  
PSA density missing: 110 (imputed with median, 0.12)  
Race missing: 37 (imputed with, Unknown)  
FamH missing: 67 (imputed with, Unknown)  
DRE missing: 77 (imputed with, Unknown)

Samples with missing PSA or Vol: 111

| GG         | 0   | 1   | 2   | 3   | 4  | 5  | Total |
|------------|-----|-----|-----|-----|----|----|-------|
| Validation | 145 | 32  | 66  | 38  | 13 | 11 | 305   |
| Discovery  | 337 | 78  | 166 | 77  | 27 | 28 | 713   |
| Total      | 482 | 110 | 232 | 115 | 40 | 39 | 1018  |

  

| Adverse Pathology | 0   | 1   | Total |
|-------------------|-----|-----|-------|
| Validation        | 245 | 58  | 305   |
| Discovery         | 577 | 136 | 713   |
| Total             | 822 | 194 | 1018  |

| Age tertiles | 1              | 2              | 3              |
|--------------|----------------|----------------|----------------|
| Discovery    | [40,61]<br>267 | (61,67]<br>214 | (67,86]<br>232 |
| Validation   | [42,60]<br>119 | (60,66]<br>95  | (66,87]<br>91  |

Figure S1: Data integrity parameters with missing data numbers and imputation strategy used.

Supplementart Figure S2  
Signatures (Expression Only)

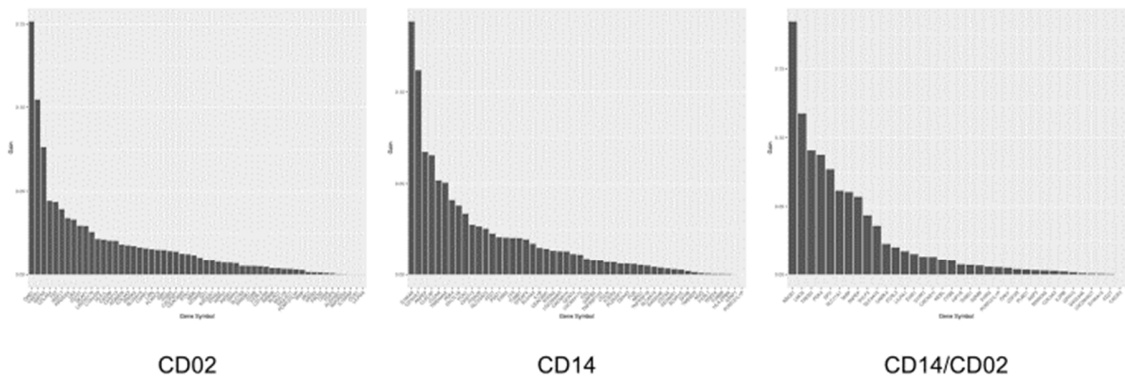

Figure S2: Three genomic expression only models with gene symbols and weightings (gains).

## Supplementary Figure S3 - Significance Tests

| Modality 1              | Modality 2              | p-Value       |
|-------------------------|-------------------------|---------------|
| CD02 (All)              | CD14/CD02 (All)         | 0.08          |
| CD14 (All)              | CD14/CD02 (All)         | <b>0.03</b>   |
| CD02 (Age G1)           | CD14/CD02 (Age G1)      | 0.11          |
| CD14 (Age G1)           | CD14/CD02 (Age G1)      | <b>0.04</b>   |
| CD02 (Age G2)           | CD14/CD02 (Age G2)      | 0.12          |
| CD14 (Age G2)           | CD14/CD02 (Age G2)      | 0.22          |
| CD02 (Age G3)           | CD14/CD02 (Age G3)      | 0.22          |
| CD14 (Age G3)           | CD14/CD02 (Age G3)      | 0.30          |
| Modality 1 + Age + PSAT | Modality 2 + Age + PSAT | p-Value       |
| CD02 (All)              | CD14/CD02 (All)         | 0.41          |
| CD14 (All)              | CD14/CD02 (All)         | <b>0.03</b>   |
| CD02 (Age G1)           | CD14/CD02 (Age G1)      | 0.30          |
| CD14 (Age G1)           | CD14/CD02 (Age G1)      | <b>0.02</b>   |
| CD02 (Age G2)           | CD14/CD02 (Age G2)      | 0.92          |
| CD14 (Age G2)           | CD14/CD02 (Age G2)      | 0.89          |
| CD02 (Age G3)           | CD14/CD02 (Age G3)      | 0.06          |
| CD14 (Age G3)           | CD14/CD02 (Age G3)      | 0.07          |
| Age                     | CD14/CD02 (All)         | <b>0.0001</b> |
| PSAT                    | CD14/CD02 (All)         | <b>0.02</b>   |

| Modality 1 + Age + PSAD | Modality 2 + Age + PSAD | p-Value        |
|-------------------------|-------------------------|----------------|
| CD02 (All)              | CD14/CD02 (All)         | 0.31           |
| CD14 (All)              | CD14/CD02 (All)         | <b>0.01</b>    |
| CD02 (Age G1)           | CD14/CD02 (Age G1)      | 0.35           |
| CD14 (Age G1)           | CD14/CD02 (Age G1)      | <b>0.003</b>   |
| CD02 (Age G2)           | CD14/CD02 (Age G2)      | 0.08           |
| CD14 (Age G2)           | CD14/CD02 (Age G2)      | 0.74           |
| CD02 (Age G3)           | CD14/CD02 (Age G3)      | 0.42           |
| CD14 (Age G3)           | CD14/CD02 (Age G3)      | 0.08           |
| CD14/CD02 (Age G1)      | CD14/CD02 (Age G2)      | 0.06           |
| CD14/CD02 (Age G3)      | CD14/CD02 (Age G2)      | <b>0.04</b>    |
| Age                     | CD14/CD02 (All)         | <b>5.1e-08</b> |
| PSAT                    | CD14/CD02 (All)         | <b>2.1e-08</b> |
| PSAD                    | CD14/CD02 (All)         | <b>0.01</b>    |

Figure S3: p-values for significance testing between modality 1 vs modality 2. Modalities include cell types, the ratio of expression between cell types and clinical factors. G1, G2 and G3 represent the low [40,61], middle [61,67] and high [67,86] tertials of age.

## Supplementary Figure S4 - UMAP for XPR+age+PSA

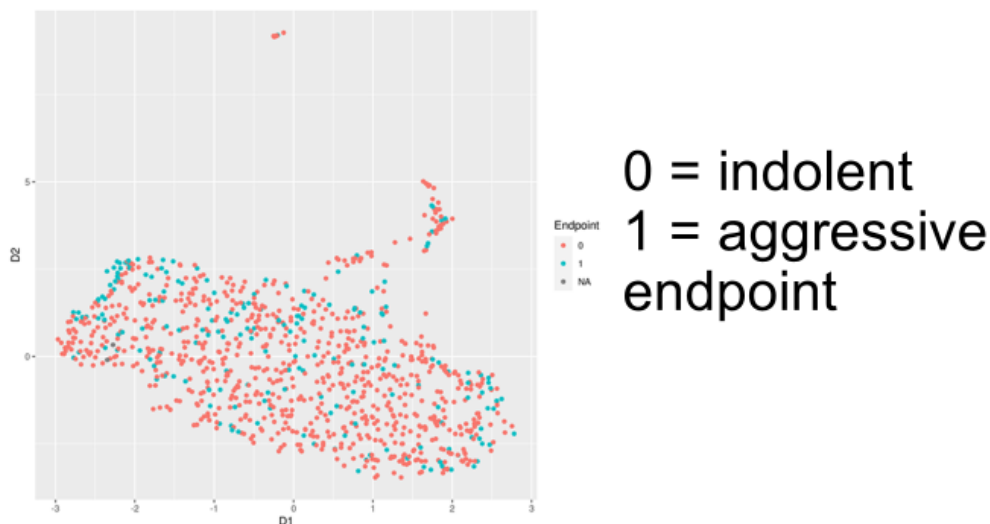

Figure S4: XPR = Genomic expression signature, UMAP = Uniform Manifold Approximation and Projection

Table S1

|    | mnames    | symbol    | Feature | Gain        | Cover       | Frequency   |
|----|-----------|-----------|---------|-------------|-------------|-------------|
| 3  | cd14/cd02 | CACNA1I   | 2108    | 0.025765869 | 0.035050536 | 0.041189931 |
| 4  | cd14/cd02 | PDK4      | 10863   | 0.017543563 | 0.031015348 | 0.025171625 |
| 5  | cd14/cd02 | TREML4    | 15410   | 0.016720457 | 0.029176667 | 0.029748284 |
| 6  | cd14/cd02 | ODZ1      | 10457   | 0.015323098 | 0.020517253 | 0.022883295 |
| 7  | cd14/cd02 | COL5A3    | 3125    | 0.014934649 | 0.01399379  | 0.016018307 |
| 8  | cd14/cd02 | SLC11A1   | 13337   | 0.014919125 | 0.012909299 | 0.016018307 |
| 9  | cd14/cd02 | GZMM      | 5961    | 0.012267362 | 0.016889437 | 0.016018307 |
| 10 | cd14/cd02 | LOC283174 | 8022    | 0.011336678 | 0.022752296 | 0.016018307 |
| 11 | cd14/cd02 | KRT72     | 7266    | 0.011233644 | 0.016872922 | 0.016018307 |
| 12 | cd14/cd02 | SLC4A10   | 13561   | 0.010039807 | 0.025581882 | 0.029748284 |
| 13 | cd14/cd02 | LBH       | 7339    | 0.008867283 | 0.011890868 | 0.013729977 |
| 14 | cd14/cd02 | CHST15    | 2875    | 0.008530193 | 0.013168036 | 0.013729977 |
| 15 | cd14/cd02 | COL6A2    | 3127    | 0.008275952 | 0.017676656 | 0.018306636 |
| 16 | cd14/cd02 | ZNF683    | 16950   | 0.008198293 | 0.012375311 | 0.018306636 |
| 17 | cd14/cd02 | ALPL      | 471     | 0.007993247 | 0.012865259 | 0.016018307 |
| 18 | cd14/cd02 | CSF1R     | 3313    | 0.007650001 | 0.011995464 | 0.016018307 |
| 19 | cd14/cd02 | SCGB3A1   | 12932   | 0.006532129 | 0.013206571 | 0.011441648 |
| 20 | cd14/cd02 | POM121L1P | 11401   | 0.006351518 | 0.013162531 | 0.013729977 |
| 21 | cd14/cd02 | SAMD3     | 12838   | 0.005979345 | 0.015595755 | 0.013729977 |
| 22 | cd14/cd02 | FAM198B   | 4727    | 0.005812442 | 0.005791293 | 0.006864989 |
| 23 | cd14/cd02 | NEBL      | 10013   | 0.005515268 | 0.013839649 | 0.011441648 |
| 24 | cd14/cd02 | RASGRP1   | 12144   | 0.005333506 | 0.009149363 | 0.006864989 |
| 25 | cd14/cd02 | KYNU      | 7284    | 0.005150843 | 0.012964349 | 0.013729977 |
| 26 | cd14/cd02 | RTN1      | 12763   | 0.005113733 | 0.018953824 | 0.016018307 |
| 27 | cd14/cd02 | CTSW      | 3398    | 0.004649075 | 0.00695836  | 0.006864989 |
| 28 | cd14/cd02 | RORC      | 12545   | 0.004534373 | 0.006523462 | 0.009153318 |
| 29 | cd14/cd02 | ABCB1     | 35      | 0.004300039 | 0.008422698 | 0.009153318 |
| 30 | cd14/cd02 | LMO2      | 7559    | 0.004273154 | 0.008714465 | 0.006864989 |
| 31 | cd14/cd02 | S100A12   | 12803   | 0.004083351 | 0.007850175 | 0.004576659 |
| 32 | cd14/cd02 | CD27      | 2499    | 0.004070016 | 0.00265893  | 0.004576659 |
| 33 | cd14/cd02 | SH2D1A    | 13195   | 0.004000255 | 0.010932993 | 0.011441648 |
| 34 | cd14/cd02 | PDZD4     | 10886   | 0.003794164 | 0.011263295 | 0.009153318 |
| 35 | cd14/cd02 | CD300LB   | 2508    | 0.003775868 | 0.003787462 | 0.006864989 |
| 36 | cd14/cd02 | FPR2      | 5247    | 0.003741399 | 0.00526281  | 0.004576659 |
| 37 | cd14/cd02 | CLEC4F    | 2970    | 0.003716222 | 0.00529584  | 0.006864989 |
| 38 | cd14/cd02 | AQP3      | 716     | 0.003545167 | 0.006600533 | 0.006864989 |
| 39 | cd14/cd02 | FOS       | 5211    | 0.003434624 | 0.003616806 | 0.006864989 |
| 40 | cd14/cd02 | PTCH1     | 11819   | 0.003296609 | 0.008758505 | 0.009153318 |
| 41 | cd14/cd02 | ASGR2     | 917     | 0.003279304 | 0.005884879 | 0.004576659 |
| 42 | cd14/cd02 | MARCKS    | 8736    | 0.003197114 | 0.00435448  | 0.004576659 |
| 43 | cd14/cd02 | SIGLEC14  | 13270   | 0.003107705 | 0.003941603 | 0.006864989 |
| 44 | cd14/cd02 | EGR1      | 4209    | 0.003056205 | 0.009589765 | 0.011441648 |

|    |           |           |       |             |             |             |
|----|-----------|-----------|-------|-------------|-------------|-------------|
| 45 | cd14/cd02 | MPEG1     | 9468  | 0.002911722 | 0.003303019 | 0.004576659 |
| 46 | cd14/cd02 | SYNE2     | 14488 | 0.002881955 | 0.004943518 | 0.004576659 |
| 47 | cd14/cd02 | POM121L4P | 11402 | 0.002781306 | 0.001073481 | 0.00228833  |
| 48 | cd14/cd02 | CD40LG    | 2524  | 0.002733438 | 0.002587365 | 0.00228833  |
| 49 | cd14/cd02 | PYGL      | 11944 | 0.002557105 | 0.003363574 | 0.004576659 |
| 50 | cd14/cd02 | MYCL1     | 9748  | 0.002481153 | 0.002587365 | 0.00228833  |
| 51 | cd14/cd02 | CSMD1     | 3320  | 0.002458057 | 0.00093035  | 0.00228833  |
| 52 | cd14/cd02 | BACH2     | 1148  | 0.002421843 | 0.002003832 | 0.004576659 |
| 53 | cd14/cd02 | ENO2      | 4354  | 0.002407792 | 0.00442054  | 0.004576659 |
| 54 | cd14/cd02 | LOXHD1    | 8389  | 0.002392796 | 0.002224033 | 0.00228833  |
| 55 | cd14/cd02 | LILRA1    | 7426  | 0.002156558 | 0.004459076 | 0.006864989 |
| 56 | cd14/cd02 | SLC44A5   | 13550 | 0.002155522 | 0.002598375 | 0.004576659 |
| 57 | cd14/cd02 | CCDC64    | 2360  | 0.002108029 | 0.003837007 | 0.006864989 |
| 58 | cd14/cd02 | IGSF9B    | 6563  | 0.002051396 | 0.00179464  | 0.00228833  |
| 59 | cd14/cd02 | RORA      | 12543 | 0.00204954  | 0.001607469 | 0.00228833  |
| 60 | cd14/cd02 | CD6       | 2536  | 0.002025291 | 0.006831744 | 0.009153318 |
| 61 | cd14/cd02 | SCML4     | 12940 | 0.001997796 | 0.002642415 | 0.00228833  |
| 62 | cd14/cd02 | RHOH      | 12375 | 0.001962694 | 0.005400436 | 0.006864989 |
| 63 | cd14/cd02 | VCAN      | 16018 | 0.001944135 | 0.000660604 | 0.00228833  |
| 64 | cd14/cd02 | CXCR3     | 3443  | 0.001938351 | 0.011775263 | 0.006864989 |
| 65 | cd14/cd02 | PID1      | 11055 | 0.001898757 | 0.009215423 | 0.006864989 |
| 66 | cd14/cd02 | EGR2      | 4210  | 0.001772491 | 0.005637152 | 0.006864989 |
| 67 | cd14/cd02 | PRF1      | 11607 | 0.001745359 | 0.003143373 | 0.004576659 |
| 68 | cd14/cd02 | NFAM1     | 10062 | 0.001724394 | 0.008841081 | 0.006864989 |
| 69 | cd14/cd02 | SAPCD2    | 12854 | 0.001711176 | 0.004315945 | 0.004576659 |
| 70 | cd14/cd02 | ADAMTSL4  | 228   | 0.001689127 | 0.003704886 | 0.006864989 |
| 71 | cd14/cd02 | TARP      | 14583 | 0.00162089  | 0.003897562 | 0.006864989 |
| 72 | cd14/cd02 | PYHIN1    | 11947 | 0.001613049 | 0.000946865 | 0.00228833  |
| 73 | cd14/cd02 | SKAP1     | 13310 | 0.00156263  | 0.004756347 | 0.004576659 |
| 74 | cd14/cd02 | SPI1      | 14129 | 0.001538732 | 0.001409288 | 0.00228833  |
| 75 | cd14/cd02 | MAL       | 8630  | 0.001512475 | 0.002273578 | 0.00228833  |
| 76 | cd14/cd02 | KLRB1     | 7225  | 0.001475973 | 0.002400194 | 0.00228833  |
| 77 | cd14/cd02 | KRT1      | 7257  | 0.001434266 | 0.002791051 | 0.006864989 |
| 78 | cd14/cd02 | B3GAT1    | 1118  | 0.00143112  | 0.003336049 | 0.006864989 |
| 79 | cd14/cd02 | ANPEP     | 613   | 0.001378165 | 0.003925088 | 0.00228833  |
| 80 | cd14/cd02 | CD86      | 2551  | 0.001240784 | 0.001205602 | 0.00228833  |
| 81 | cd14/cd02 | MS4A14    | 9597  | 0.001223076 | 0.008169467 | 0.006864989 |
| 82 | cd14/cd02 | FGFBP2    | 5039  | 0.001218224 | 0.003016757 | 0.00228833  |
| 83 | cd14/cd02 | MS4A7     | 9602  | 0.001213586 | 0.006204171 | 0.004576659 |
| 84 | cd14/cd02 | GPR15     | 5754  | 0.001088714 | 0.003319534 | 0.006864989 |
| 85 | cd14/cd02 | CCR4      | 2447  | 0.000999904 | 0.001431308 | 0.00228833  |
| 86 | cd14/cd02 | F13A1     | 4554  | 0.000965831 | 0.003925088 | 0.00228833  |
| 87 | cd14/cd02 | CD247     | 2497  | 0.000932436 | 0.002620395 | 0.00228833  |
| 88 | cd14/cd02 | EOMES     | 4377  | 0.00092602  | 0.001800145 | 0.00228833  |
| 89 | cd14/cd02 | CD1D      | 2485  | 0.000907206 | 0.004651752 | 0.006864989 |

|     |           |           |       |             |             |             |
|-----|-----------|-----------|-------|-------------|-------------|-------------|
| 90  | cd14/cd02 | C19orf59  | 1677  | 0.000884088 | 0.001860701 | 0.00228833  |
| 91  | cd14/cd02 | LOC284837 | 8060  | 0.000868144 | 0.002702971 | 0.00228833  |
| 92  | cd14/cd02 | TC2N      | 14676 | 0.000827999 | 0.002422214 | 0.00228833  |
| 93  | cd14/cd02 | LCK       | 7345  | 0.000793051 | 0.00704644  | 0.006864989 |
| 94  | cd14/cd02 | GZMB      | 5958  | 0.000733918 | 0.000759694 | 0.00228833  |
| 95  | cd14/cd02 | GZMA      | 5957  | 0.000731485 | 0.00429943  | 0.004576659 |
| 96  | cd14/cd02 | NAPSB     | 9872  | 0.000677812 | 0.003187413 | 0.004576659 |
| 97  | cd14/cd02 | ZAP70     | 16363 | 0.000651416 | 0.00264792  | 0.004576659 |
| 98  | cd14/cd02 | ALDH1A1   | 421   | 0.000618264 | 0.001260652 | 0.00228833  |
| 99  | cd14/cd02 | CD28      | 2502  | 0.000596694 | 0.001811155 | 0.00228833  |
| 100 | cd14/cd02 | HIP1R     | 6154  | 0.000567496 | 0.0008753   | 0.00228833  |
| 101 | cd14/cd02 | GPR56     | 5783  | 0.000528153 | 0.003837007 | 0.00228833  |
| 102 | cd14/cd02 | S100A9    | 12811 | 0.000492099 | 0.000451413 | 0.00228833  |
| 103 | cd14/cd02 | CLEC12A   | 2953  | 0.000482809 | 0.004618722 | 0.004576659 |
| 104 | cd14/cd02 | GATA3     | 5405  | 0.000441024 | 0.001260652 | 0.00228833  |
| 105 | cd14/cd02 | CD5       | 2529  | 0.000414809 | 0.001332218 | 0.00228833  |
| 106 | cd14/cd02 | CST7      | 3342  | 0.000377496 | 0.000346817 | 0.00228833  |
| 107 | cd14/cd02 | CLEC4E    | 2969  | 0.000337332 | 0.002113932 | 0.00228833  |
| 108 | cd14/cd02 | TIGIT     | 14883 | 0.000278518 | 0.003187413 | 0.004576659 |
| 109 | cd14/cd02 | HCK       | 6039  | 0.000265714 | 0.002653425 | 0.00228833  |
| 110 | cd14/cd02 | ATP1A4    | 1003  | 0.000243019 | 0.002521304 | 0.00228833  |
| 111 | cd14/cd02 | AQP9      | 720   | 0.000233741 | 0.001040451 | 0.00228833  |
| 112 | cd14/cd02 | GZMH      | 5959  | 0.000206169 | 0.00093035  | 0.00228833  |
| 113 | cd14/cd02 | SULF2     | 14420 | 0.000147204 | 0.002058882 | 0.00228833  |
| 114 | cd14/cd02 | LILRA3    | 7428  | 0.000139055 | 0.000974391 | 0.00228833  |
| 115 | cd14/cd02 | CD14      | 2472  | 9.39E-05    | 0.000407372 | 0.00228833  |
| 116 | cd14/cd02 | IL7R      | 6627  | 7.09E-05    | 0.000363332 | 0.00228833  |
| 117 | cd14/cd02 | RIN2      | 12401 | 4.08E-05    | 0.002950697 | 0.00228833  |
| 118 | cd14/cd02 | VNN1      | 16051 | 3.37E-05    | 0.001156057 | 0.004576659 |
| 119 | cd14/cd02 | NCALD     | 9908  | 2.78E-05    | 0.00088631  | 0.00228833  |
| 120 | cd14/cd02 | TREM1     | 15406 | 2.75E-05    | 0.000478938 | 0.00228833  |
| 121 | cd14/cd02 | SYCP2L    | 14476 | 7.65E-06    | 0.00171757  | 0.00228833  |
| 122 | cd14/cd02 | LGALS2    | 7399  | 5.01E-06    | 0.000600048 | 0.00228833  |

Statistical modeling assumptions:

1. The discovery and validation cohorts are independently and identically distributed samples from the same population.
2. The ranking of the gene-wise variances of gene expression data between discovery and validation cohorts are consistent.

Table S2: AA = African American, DRE = digital rectal exam. CD14/CD2 is genomics only model performance while CD14/CD2 + Clinical (PSAD, Age) is combined clinical and genomic model. PSAD = PSA density i.e. PSA/prostate gland volume.

| Model                           | AUC (val)         |                   | p value |
|---------------------------------|-------------------|-------------------|---------|
|                                 | Race (not AA)     | Race (AA)         |         |
| CD14/CD2 + Clinical (PSAD, Age) | 0.85 (0.78, 0.91) | 0.72 (0.55, 0.89) | 0.09    |
| CD14/CD2                        | 0.69 (0.61, 0.78) | 0.67 (0.44, 0.90) | 0.42    |
|                                 | DRE (normal)      | DRE (abnormal)    |         |
| CD14/CD2 + Clinical (PSAD, Age) | 0.84 (0.77, 0.91) | 0.82 (0.71, 0.93) | 0.36    |
| CD14/CD2                        | 0.72 (0.62, 0.82) | 0.64 (0.50, 0.78) | 0.18    |
